# Supplementary material for: AHT Bézier Curves and NUAHT B-Spline Curves
Source: Springer Nature journal article supplement (doi:10.1007/s11390-007-9073-z), 2007-07-01
Supplement: 11390_2007_9073_MOESM1_ESM.pdf [file 11390_2007_9073_MOESM1_ESM.pdf]

## AHT Bézier 曲线 及 NUAHT B 样条曲线

曲线曲面造型是计算机图形学的重要课题。有理 Bézier 模型和有理 B 样条(NURBS)模型虽然已成为 CAGD(计算机辅助几何设计)系统中曲线曲面的标准表示形式。但它们仍存在一些不足,例如,求导和求积运算比较复杂,更重要的是,它们无法精确表示 CAD/CAM 系统中经常用到的一些特殊的曲线曲面,如悬链线、螺旋线,极小曲面等。为克服这些缺点,人们相继在其他的函数空间中建立曲线曲面模型。但现有的混合形式模型只能表示一类圆锥曲线,无法实现圆锥曲线的统一表示,这就给几何造型带来了不便。张纪文等利用三角函数和双曲函数的内在联系,实现了圆锥曲线和多项式曲线的统一表示。但在此模型中,三角函数和双曲函数不能同时出现,这就限制了它的曲线造型能力。

为了构造出一种相对完美的曲线曲面模型,本文在空间  $span\{\cos t, \sin t, \sinh t, \cosh t, 1, t, t^2, \dots, t^{k-5}\}$  中构造了拟 Bézier 基和拟非均匀 B 样条基。在拟非均匀 B 样条基的构造过程中,由于节点情况比较复杂,本文巧妙地利用行列式把所有的节点情况统一到一个表达式中。然后,本文以这两组基为基础构造了相应的曲线曲面模型,称之为代数双曲三角 Bézier 曲线曲面及非均匀代数双曲三角 B 样条曲线曲面。此类曲线曲面具有与多项式空间中的 Bézier 曲线曲面及非均匀 B 样条曲线面完全类似的性质。它们除了可以表示通常的多项式曲线曲面外,还可以精确表示所有的圆锥曲线曲面和一些超越曲线,如螺旋线,悬链线,以及一些特殊的极小曲面,并且不需要有理形式,同时,求导和求积运算也非常方便,这非常有利于分析曲线曲面的性质。

为了突出新模型的实用价值,本文还利用该模型给出了圆、螺旋线、悬链线、正螺面、悬链面以及两类极小曲面的几何构造方法,从而为把以上的特殊曲线曲面模型引入 CAD 造型系统提供了一个有力工具。因此,本文提出的新模型不仅具有重要的理论价值,而且在工程实践中也有重要的应用价值,有望成为 CAD 系统中新的曲线曲面标准表示形式。
